# Supplementary material for: A multifunctional collagen-base bilayer membrane integrated with a bimetallic/polydopamine network for enhanced guided bone regeneration
Source: Royal Society of Chemistry journal article supplement (doi:10.1039/d4tb00512k), 2024-01-01
Supplement: d4tb00512k1.pdf [file d4tb00512k1.pdf]

## Supporting Information

### **A Multifunctional Collagen-Base Bilayer Membrane integrated with Bimetallic/Polydopamine Network for Enhanced Guided Bone Regeneration**

Dou Huang<sup>a</sup>, Die Yang<sup>b</sup>, Kaide Li<sup>c</sup>, Jiran Wang<sup>a</sup>, Xiaohui Zheng<sup>a</sup>, Jie Long<sup>a</sup>, Lei Liu<sup>a,†</sup>

<sup>a</sup> State Key Laboratory of Oral Diseases & National Center for Stomatology & National Clinical Research Center for Oral Diseases & Department of Oral and Maxillofacial Surgery, West China Hospital of Stomatology, Sichuan University, Chengdu, 610041, China

<sup>b</sup> Department of Pharmaceutics and Bioengineering, School of Chemical Engineering, Sichuan University, Chengdu, 610065, P. R. China

<sup>c</sup> The Second Affiliated Hospital Zhejiang University School of Medicine, Hangzhou, 310009, P.R.China

† Correspondence: drliulei@163.com.

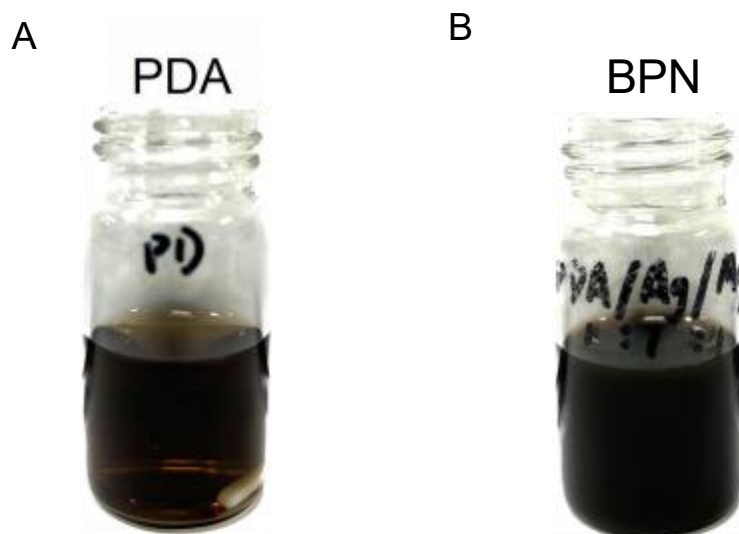

**Fig S1.** Photographs of the A) PDA solution and B) BPN solution.

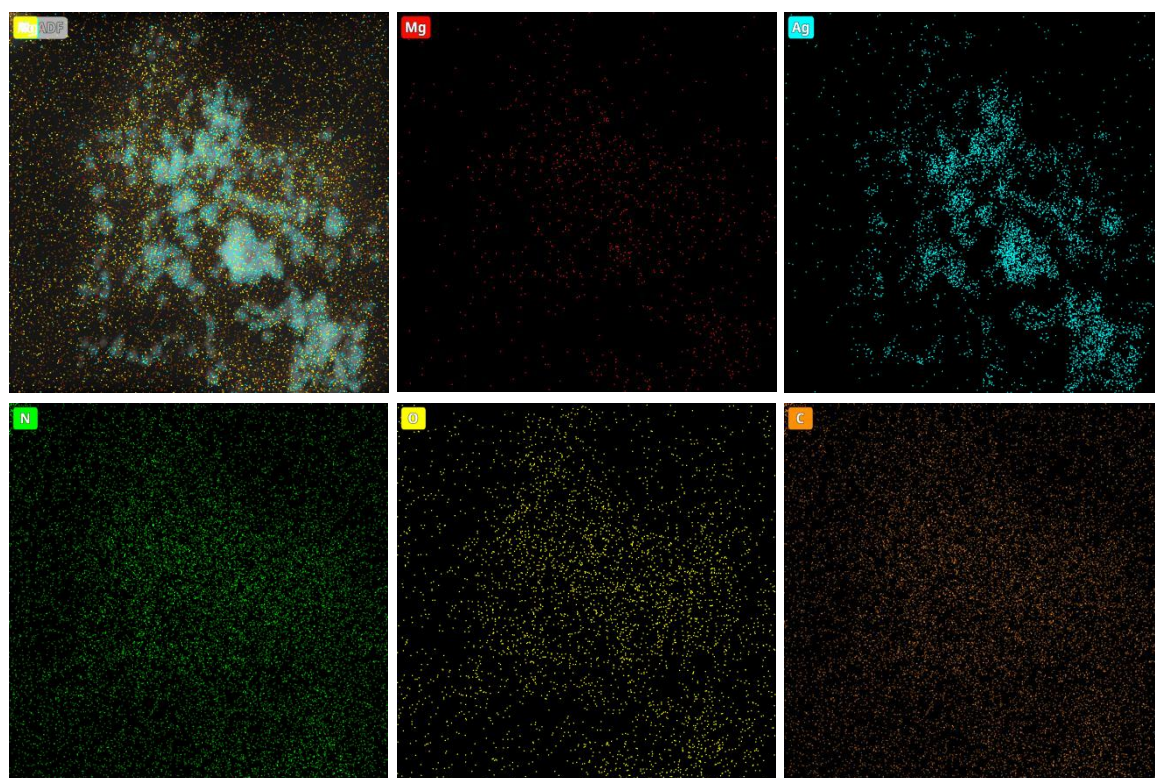

**Fig S2.** EDS images of BPN.

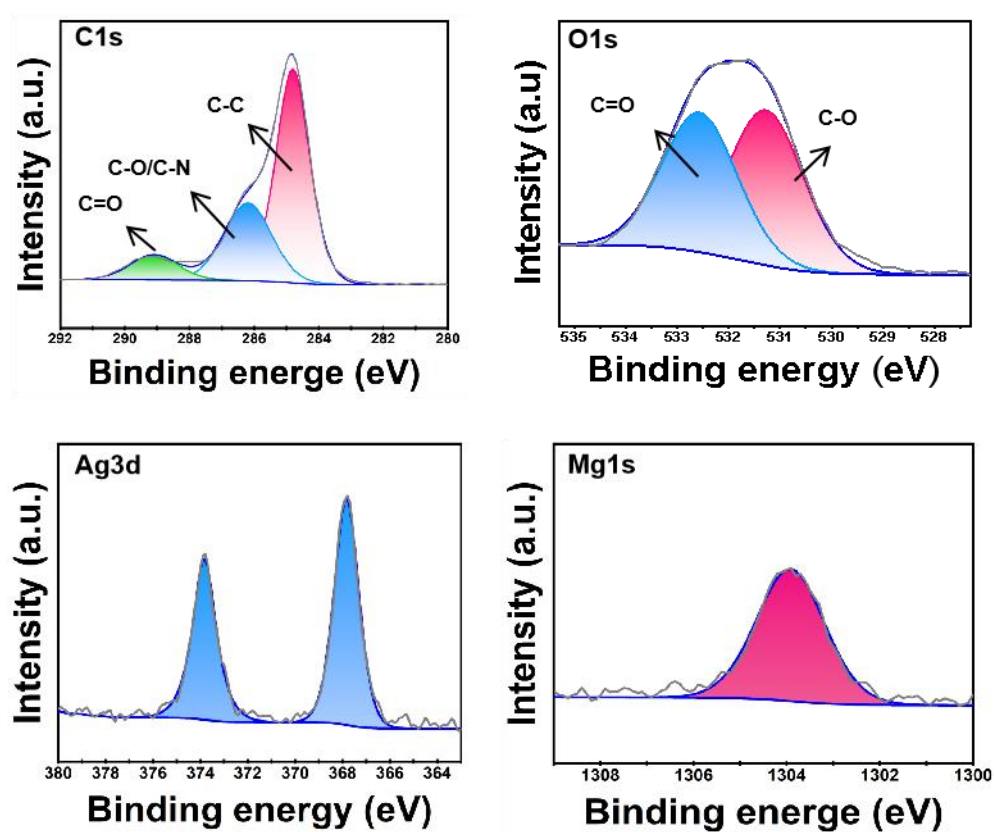

Fig S3. High-resolution XPS spectra of C1s, O1s, Ag 3d and Mg1s of BPN.

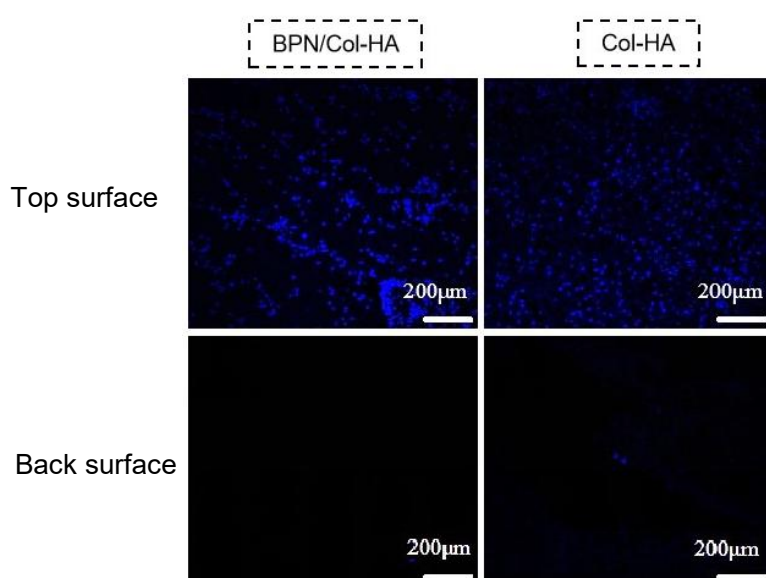

Fig S4. DAPI staining of cells on the top and back surfaces of BPN/Col-HA membranes and Col-HA membranes.



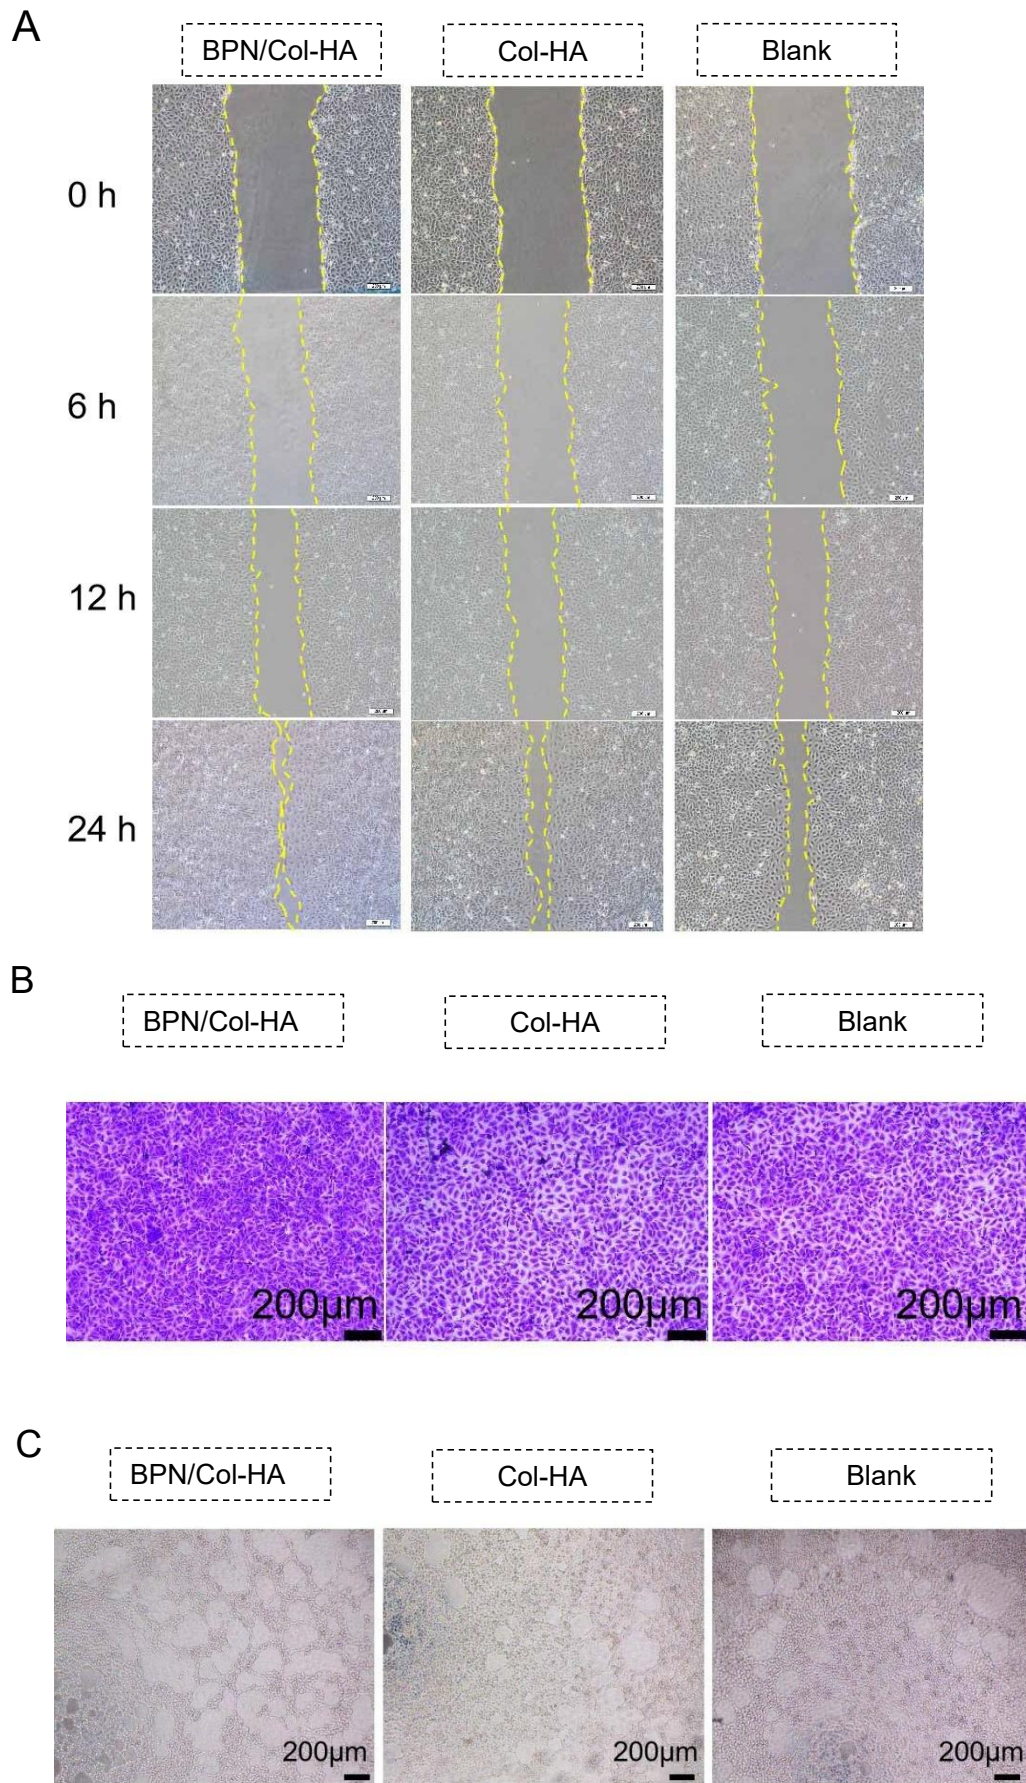

Fig S5. Angiogenesis experiments. A) cell migration area in wound healing assay; B) cell crystal violet staining in chemotaxis assay; C) tube formation assay.

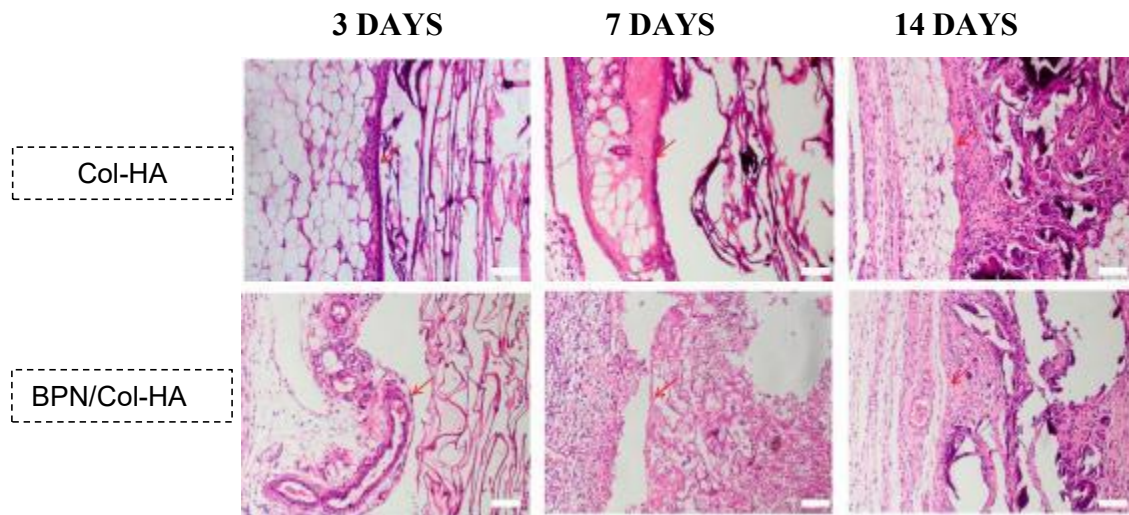

Fig S6. H&E stained sections of rat skin with Col-HA and BPN/Col-HA membrane in subcutaneous implantation model (bar=200 $\mu$ m). Arrows indicate fibrous layers.



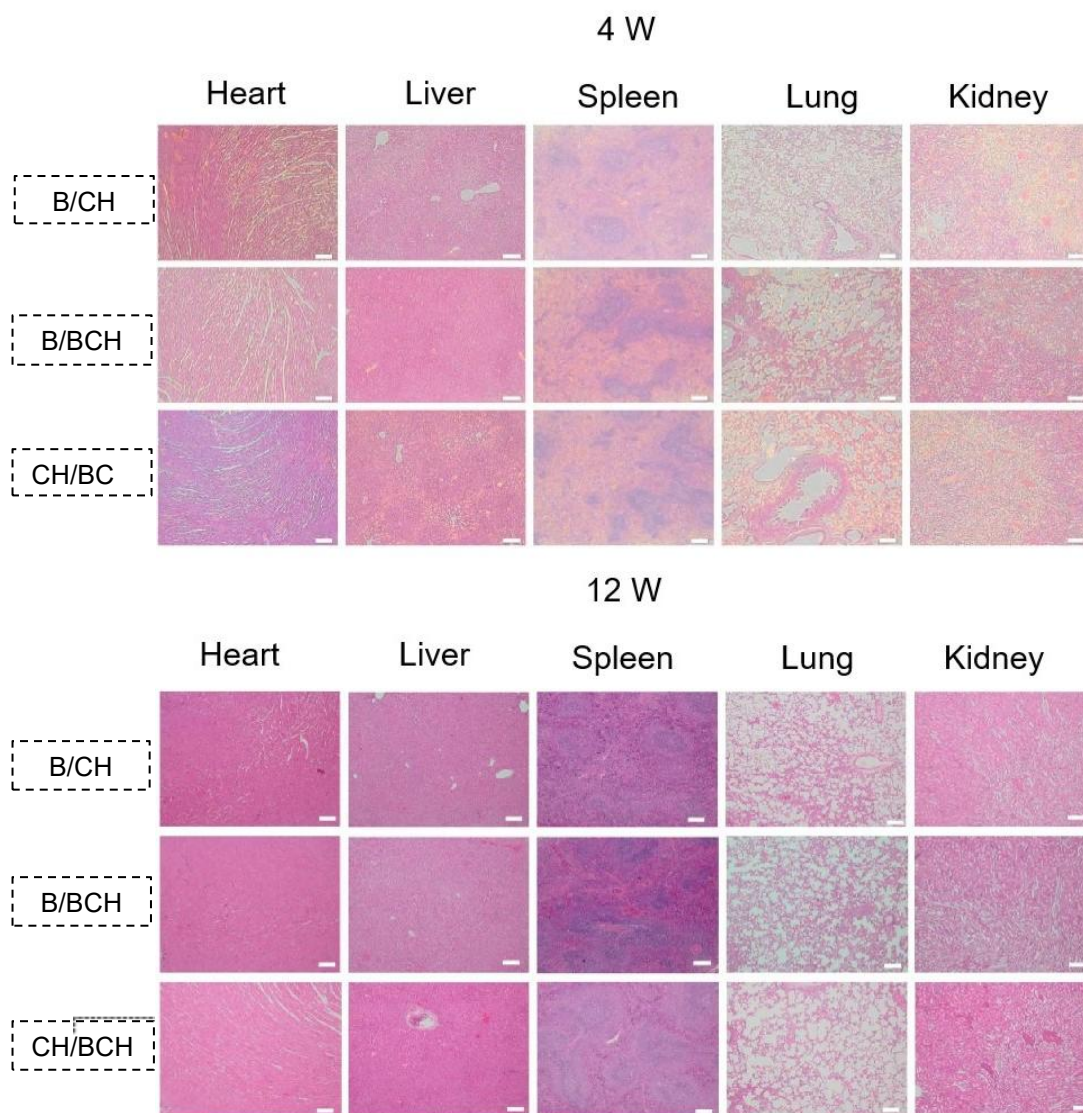

Fig S7. H&E sections of the heart, liver, spleen, lung, and kidney after 4 and 12 weeks post-surgery in rat cranial defect models (bar=200 $\mu$ m). B: blank control; CH: Col-HA; BCH: BPN/Col-HA.

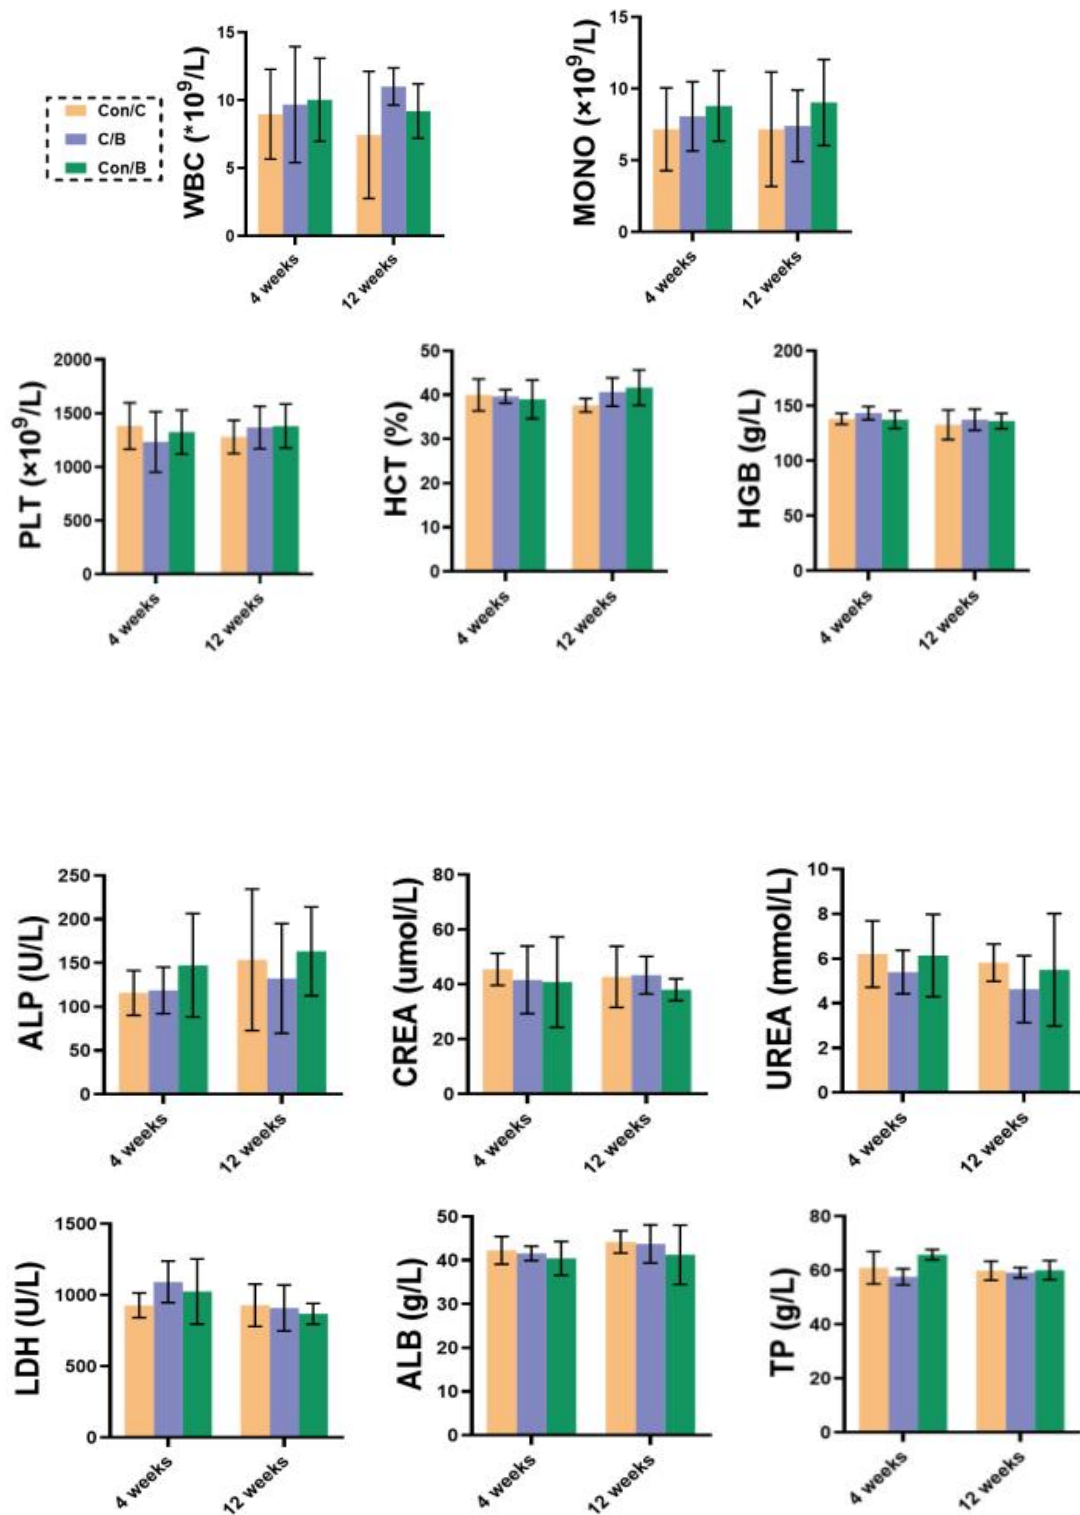

Fig S8. Hematologic parameters after 4 and 12 weeks post-surgery in rat cranial defect models. Con, Control; C, Col-HA; B, BPN/Col-HA.
